# Supplementary material
Source: Springer Nature journal article supplement (https://www.springerprofessional.de/resource/supplementary/13638_2011_214_MOESM1_ESM.pdf/11898088)

*Parent 1*

1011010 | 010100110

*Parent 2*

0011010 | 110110101

1011010 | 110110101

*Child 1*

0011010 | 010100110

*Child 2*

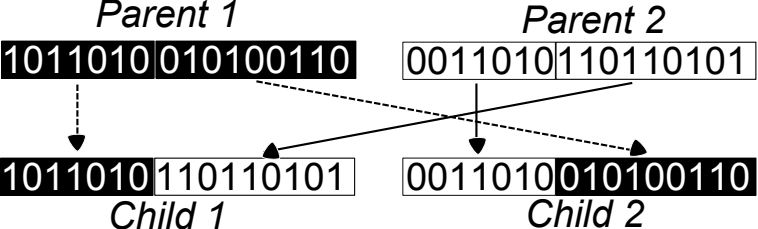

Supplement: MOESM1 [file 11898088]
